# Supplementary material
Source: MDPI journal article supplement (https://www.mdpi.com/2075-4701/7/10/395)
Supplement: s1 [file s1]

## Supplementary Information

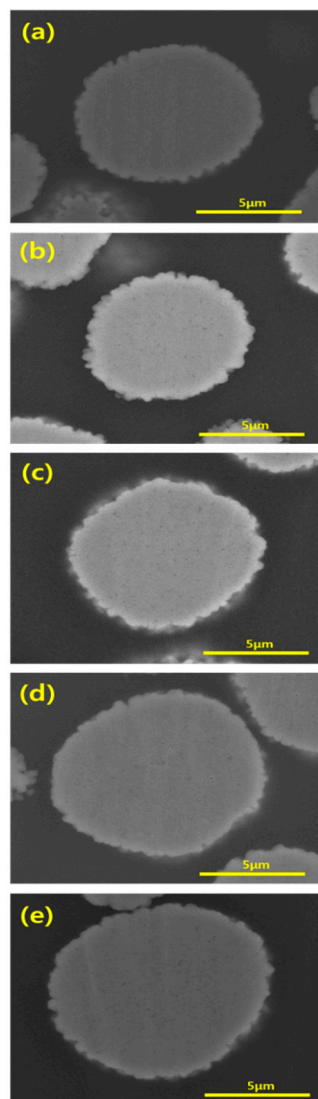

**Figure S1.** SEM cross-section images of the cathode active materials.

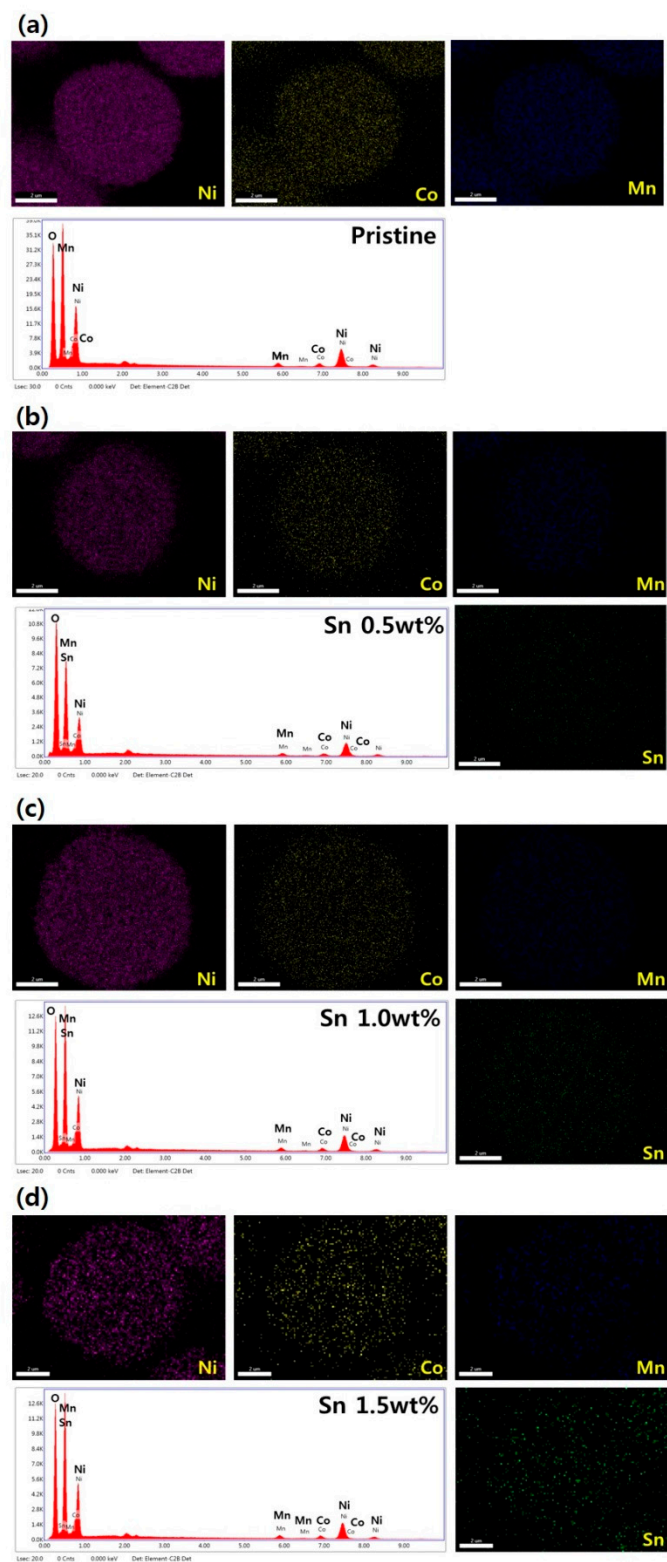

**Figure S2.** EDS cross-section mapping of the cathode active materials: (a) pristine, (b) Sn 0.5wt%, (c) Sn 1.0wt%, and (d) Sn 1.5wt%.

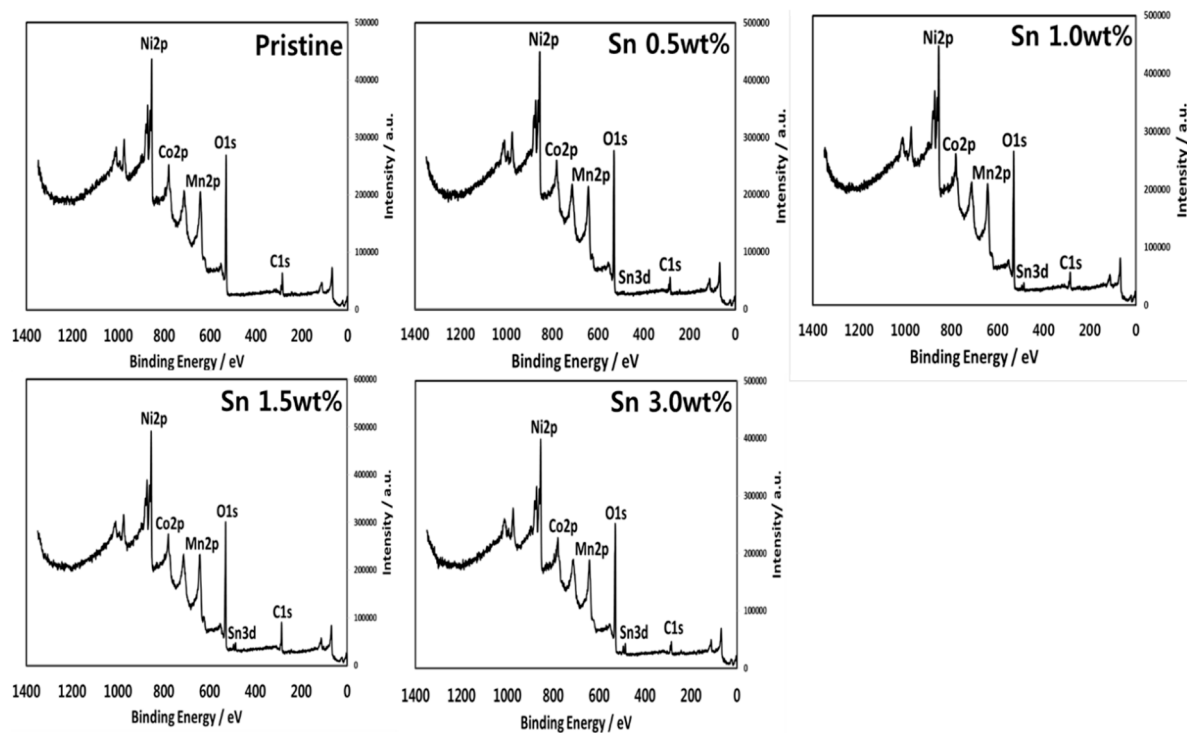

**Figure S3.** Wide XPS of the cathode active materials.

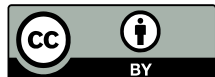

© 2017 by the authors; licensee MDPI, Basel, Switzerland. This article is an open access article distributed under the terms and conditions of the Creative Commons by Attribution (CC-BY) license (<http://creativecommons.org/licenses/by/4.0/>).
